# Supplementary material
Source: PubMed Central journal article supplement (PMC2996014)
Supplement: pp.110.165431_1.pdf [file pp.110.165431_1.pdf]

**Supplementary Information****Supp. Figure 1**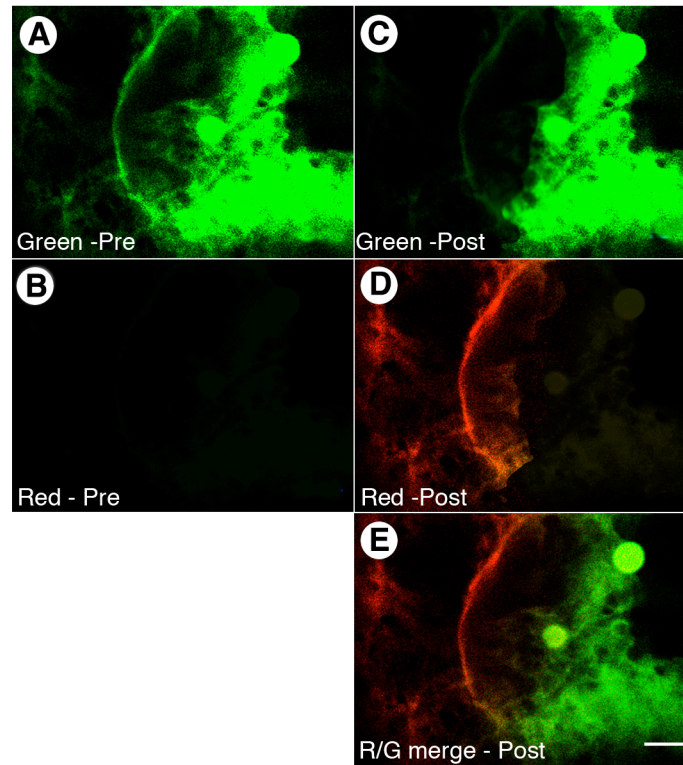

Supp. Figure 1. A region lying between two onion epidermal cells transiently expressing mEosFP::PIP1 probe shows the non-converted (green) and the photo-converted (red) labeling of tubular-vesicular membranes. Panel A and B show fluorescence in green and red channels, respectively, before photoconversion whereas B and D show fluorescence obtained following photoconversion. Panel E is a merge of both green and red channels.

## Supplementary Figure 2.

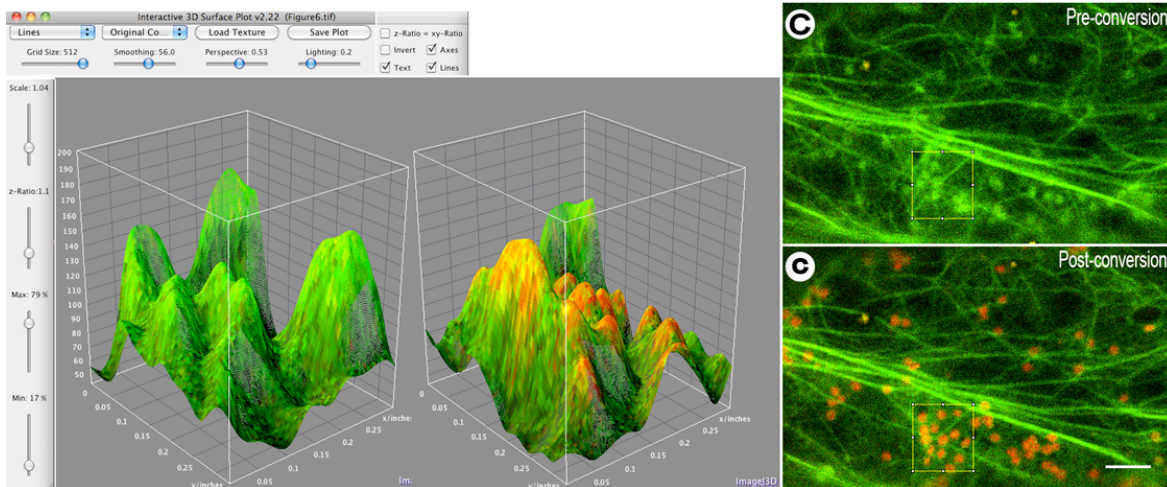

Figure 2. Golgi bodies highlighted by mEosFP::GONST1 and F-Actin (highlighted using GFP::mTalin) co-visualized before (C) and after photoconversion (c). The rapid motility of Golgi bodies does not allow direct comparisons to be drawn between pre and post conversion images in separate channels and therefore merged images acquired in both channels are presented. The inset 3D-surface plot clearly shows quantifiable changes in the color of Golgi bodies between their pre- and post- photo conversion sites.

**Movie 1. mEosFP2xFYVE tub.mov**

Time lapse imaging of a thin PI(3)P enriched tubule in a cell expressing mEosFP::2xFYVE probe over ca. 130 seconds. (1 frame acquired every 5 seconds; movie speeded up 10 X) The tubule shown here was specifically photoconverted earlier as a single vesicle that started exhibiting an erratic vibrational motion. During its visualization (x,y,t) the tubule changes its shape and appears to snare another photoconverted vesicles. All adjacent green vesicles have remained non-photoconverted.

**Table 1.** PCR primers used for creating mEosFP probes.

## Supplementary Information

Table 1. Primers used for designing different mEosFP –based probes

| Probe                   | Primers (Forward - Reverse)                                                            | RE site               |
|-------------------------|----------------------------------------------------------------------------------------|-----------------------|
| <b>mEosFP::PIP1</b>     | <b>GCCGGCATGGAAGGCAAGGAAGAAGACG</b><br><b>ACTAGTTTAGCTTCTGGACTTGAAGGGGATG</b>          | NaeI / SpeI           |
| <b>mEosFP::TIP1</b>     | <b>GCCGGCATGGCAACATCAGCTCGTAGAGCA</b><br><b>ACTAGTCTAGTAATCTTCAGGGGCCAAGGG</b>         | NaeI / SpeI           |
| <b>CX::mEosFP</b>       | <b>GGGATCCGGTACCATGGACTACAAAGACGAT</b><br><b>CATTCCTCCCAGCTCTTATCGTCTGGCATT</b>        | BamHI/SacI            |
| <b>Mito - mEosFP</b>    | <b>ATACTAGTATGGACTACAAAGAC</b><br><b>ATGAGCTCTTATCGTCTGGCATTGTC</b>                    | SpeI / SacI           |
| <b>mEosFP::2xFYVE</b>   | <b>GCCGGCATGTTCGCTGCTGAAAGAGCCCCT</b><br><b>ACTAGTATGCCTTCTTGTTTCAGCTGCTCATA</b>       | NaeI / SpeI           |
| <b>mEosFP::GONST1</b>   | <b>GCCGGCATGAAATTTACGAACACGATGGA</b><br><b>ACTAGTTTAGGACTTCTCCCTCATTTTGGC</b>          | NaeI / SpeI           |
| <b>mEosFP-PTS1</b>      | <b>ACCCAAGCTTGGTACCATGGACTACAAAGA</b><br><b>CCTCTAGATTACAGCTTGGAGGCATTGTCA</b>         | HindIII-KpnI/<br>XbaI |
| <b>mEosFP::ABD-MAP4</b> | <b>CGGTACCGCTCGATGAGTGCGATT</b><br><b>CTTATGCGGCCGCATTGTCAGGCA</b>                     | KpnI/NotI             |
| <b>mEosFP::FABDmTn</b>  | <b>CCACGCTCGAGATGAGTGCGATTAAGCCA</b><br><b>ATTATTGCCGGCTCGTCTGGCATTGTCAG</b>           | XhoI/NaeI             |
| <b>LIFEACT::mEosFP</b>  | <b>GGATCCACCGAGTGCGATTAAGCCAGACATGAAG</b><br><b>GGCGGCCGCTTATCGTCTGGCATTGTCAGGCAAT</b> | BamHI/ NotI           |
|                         |                                                                                        |                       |
